# Supplementary material for: Transcriptional gene silencing requires dedicated interaction between HP1 protein Chp2 and chromatin remodeler Mit1
Source: PubMed Central journal article supplement (PMC6499331; doi:10.1101/gad.320440.118), 2019-05-01
Supplement: supp_gad.320440.118_Supplemental_Information_1.pdf [file supp_gad.320440.118_Supplemental_Information_1.pdf]

## **Supplemental Information**

# **Transcriptional gene silencing requires dedicated interaction between HP1 protein Chp2 and chromatin remodeler Mit1**

Karoline Leopold<sup>1</sup>, Alessandro Stirpe<sup>1</sup>, Thomas Schalch<sup>1,2%</sup>

<sup>1</sup> Department of Molecular Biology, Faculty of Science, Sciences III, University of Geneva,  
CH-1211 Geneva 4, Switzerland

<sup>2</sup> Leicester Institute for Structural and Chemical Biology, Department of Molecular and Cell  
Biology, University of Leicester, Leicester, LE1 9HN, UK

Supplemental Figures S1-S4  
Supplemental Tables S1-2

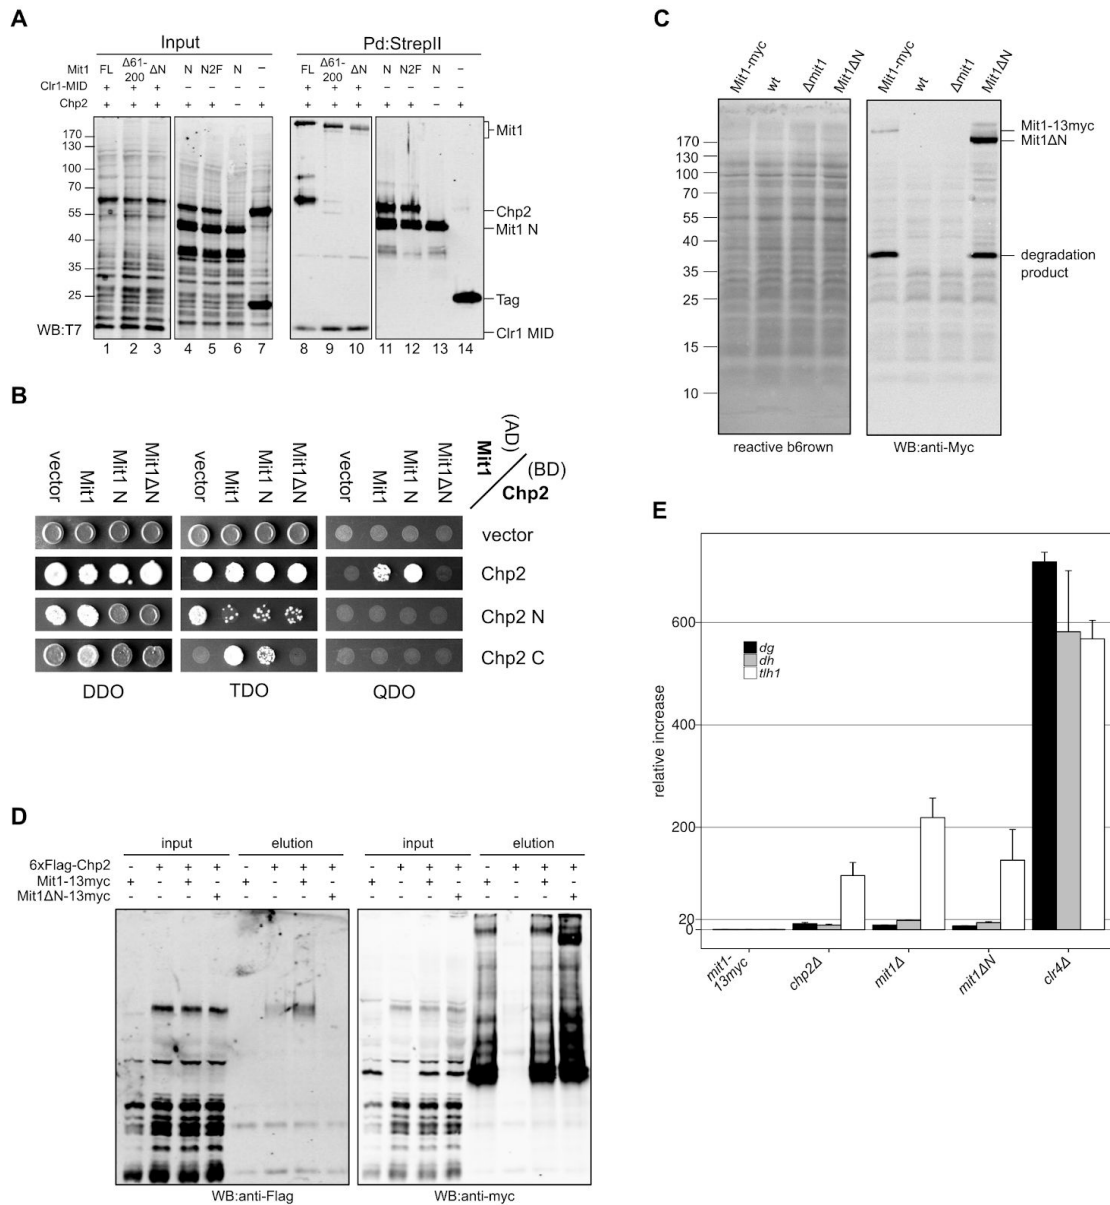

**Figure S1: Expression levels of Mit1 constructs.** (A) Pull-down experiments with a co-expressed ternary complex of Chp2, Clr1's Mit1 interacting domain (MID) and StrepII-tagged Mit1 fragments from insect cells. N2F corresponds to combined PxVxL motif mutants V20F and V72F. (B) Yeast-2-hybrid interaction screen between Mit1 and Chp2 fragments. DDO: double dropout medium SD/-Trp/-Leu; TDO: triple dropout medium; SD/-Trp/-Leu/-His; QDO: quadruple dropout medium SD/-Trp/-Leu/-His/-Ade (C) Western blot with anti-Myc antibody on *S. pombe* whole cell lysates for indicated strains. Reactive brown, a non-specific protein stain, shows sample loading. (D) Whole size blot for co-IP experiment in Fig. 1D. (E) Rescaled version of Fig. 1D including *clr4Δ*.

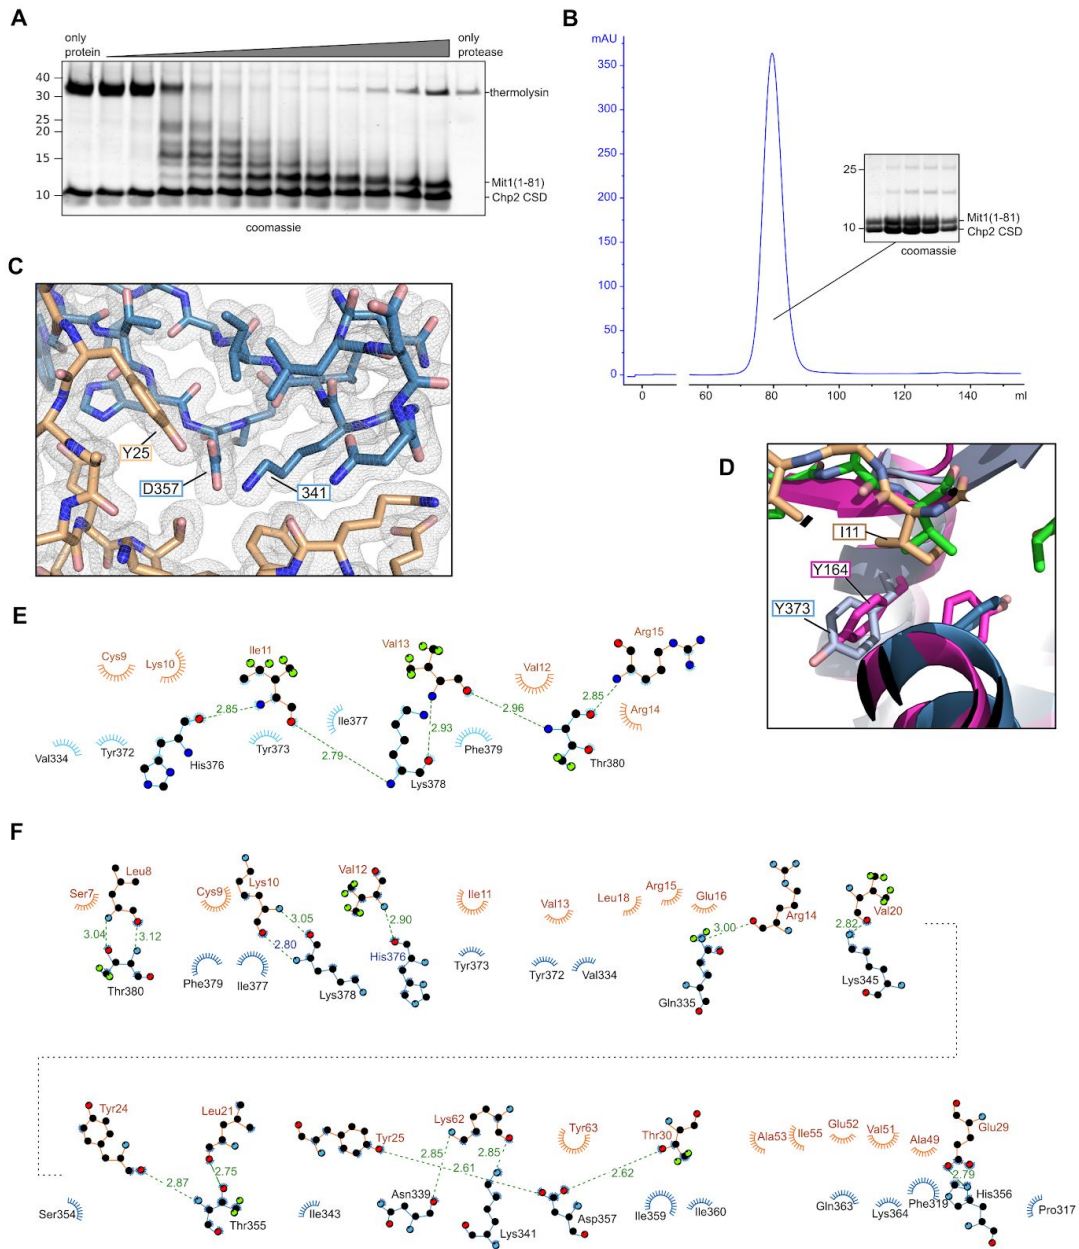

**Figure S2: Limited proteolysis reveals minimal Chp2–Mit1 complex.** (A) SDS PAGE gel of limited proteolysis with thermolysin on the Chp2–Mit1(1-299) complex. (B) The Chp2–Mit1(1-81) complex elutes as a single peak from SEC. (C) Electron density (gray) for interface between Chp2 CSD and the Mit1 linker segment around residue Y25 contoured at  $1.5 \sigma$ . (D) Superposition of Chp2–Mit1 (blue-orange) onto the HP1–CAF-1 (pink-green, PDBID:1S4Z) complex suggests how rotation of the Chp2Y373 side chain at the central position of the dimerization groove can accommodate the extra methyl group of Chp2I111. (E) LigPlot+ interaction diagram for Mit1 (orange) and Chp2 CDS1 (light blue). (F) LigPlot+ interaction diagram for Mit1 (orange) and Chp2 CSD2 (dark blue)

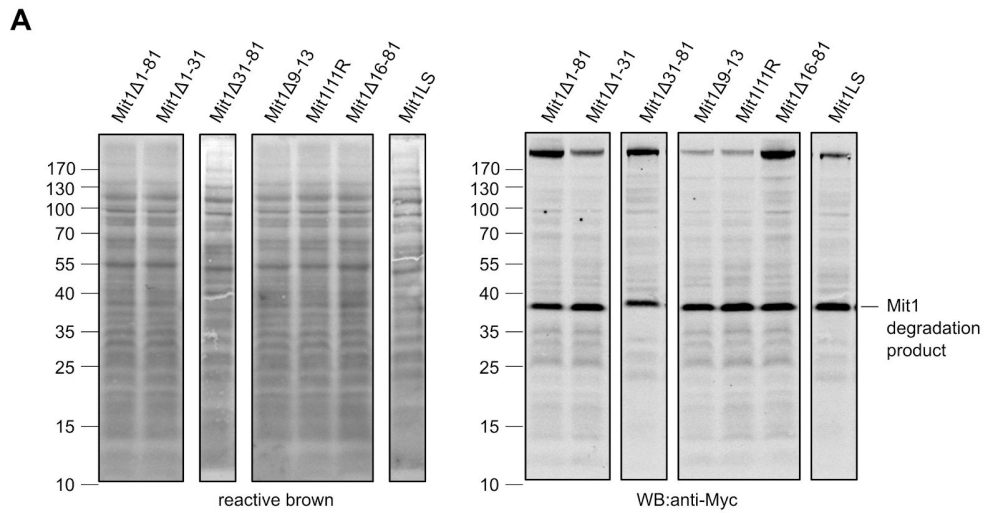

**Figure S3: . Protein levels of Mit1 mutants.** (A) Western blot with anti-Myc antibody on *S. pombe* whole cell lysates for indicated strains. Reactive brown, a non-specific protein stain, shows sample loading. Lanes are cut from two simultaneously and identically performed Western blots.

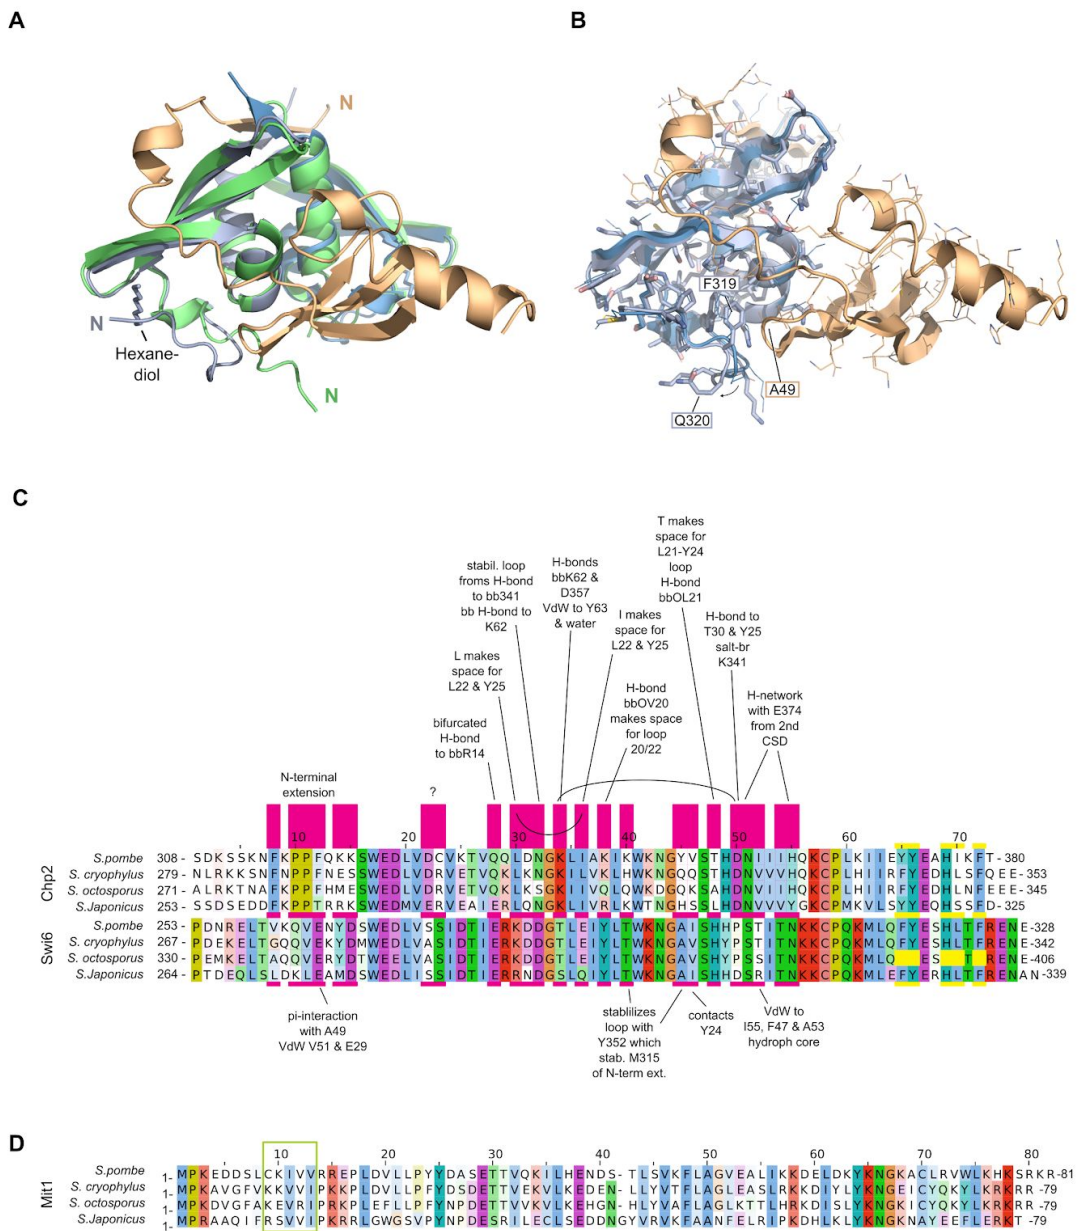

**Figure S4: Chp2 and Swi6 sequence differences are conserved.** (A) Swi6CSDs superimposed onto Chp2CSDs with  $C\alpha$  RMSD of 0.85 Å (Chp2 and Mit1 colored as in Fig. 2, Swi6CSD in green, PDBID: 1E0B). Note divergence of N-termini. (B) Superposition of CSD2 (darker blue) onto CSD1 (lighter blue), which is bound to Mit1, with  $C\alpha$  RMSD of 0.3 Å. Side chains of the the Mit1-bound CSD1 are shown in stick representation. (C) Comparison of conserved positions in Swi6 and Chp2 CSD alignments across *Schizosaccharomyces* species. Annotations describe observations with respect to complex formation with Mit1 (bb=back bone). (D) Multiple sequence alignment of N-terminal Mit1 domains. Green box marks CKIVV motif.



## Supplemental Tables

**Table S1. Strains used in this study**

| Name   | Genotype                                                                                              | Figure | Source                 |
|--------|-------------------------------------------------------------------------------------------------------|--------|------------------------|
| S.0DM  | h- rpl42-P56Q(cyhR) ade6M210 ura4-D18 mit1-13myc::KanMX6                                              | 1D, 1F | this study             |
| S.0JP  | h+ chp2::3xFLAG-(x2)-chp2+ leu1-32 ura4D18 his7-366 ade6DN/N                                          | 1D     | Nakayama lab           |
| S.0L0  | h- ade6M210 ura4-D18 mit1::mit1ΔN-13myc_KanMX6<br>chp2::3xFLAG-(x2)-chp2+                             | 1D     | this study             |
| S.0L1  | h- ade6M214 ura4-D18 mit1::mit1-13myc_KanMX6<br>chp2::3xFLAG-(x2)-chp2+                               | 1D     | this study             |
| S.0DY  | h+ ura4DS/E otr1R::ura4+ leu1-32 ade6-216                                                             | 1E, 3C | (Sugiyama et al. 2007) |
| S.0E0  | h+ ade6-M216 ura4-DS/E mit1::rpl42-natMX6(Δmit1) otr1R::ura4 leu1-32                                  | 1E, 3C | this study             |
| S.0E2  | h+ ade-M216 ura4-D18 mit1ΔN-13myc::KanMX6 leu1-32 otr1R::ura4                                         | 1E     | this study             |
| S.0EH  | h- ade6-M216 ura4-D18 mit1-13myc::KanMX6 otr1R::ura4                                                  | 1E, 3C | this study             |
| S.0D9  | h- rpl42-P56Q(cyhR) ade6-M210 ura4-D18 mit1ΔN-13myc::KanMX6                                           | 1F, 3D | this study             |
| S.05O  | h- 972/WT                                                                                             | 1F     | Simanis lab            |
| PY4281 | h- chp2Δ::KanMX6 ade6-210 arg3-D4 his3-D1 leu1-32 ura4-D18                                            | 1F     | (Job et al. 2016)      |
| S.0D1  | h- rpl42-P56Q(cyhR) ade6M210 ura4-D18 mit1::rpl42-natR(Δmit1)                                         | 1F     | this study             |
| S.0H0  | h+ clr4Δ::KanMX6 ade6M210? ura4-D18                                                                   | 1F     | this study             |
| S.0FZ  | h+ chp2Δ::KanMX6 otr1R::ura4+ leu1-32 ade6-M210 ura4-D18                                              | 3C     | this study             |
| S.0II  | h- mit1::mit1LS-13myc-KanMX6 ade6-210 ura4-D18 leu1-32 otr1R::ura4+                                   | 3C     | this study             |
| S.0IJ  | h+ chp2::chp2-3xFlag-KanMX6 mit1::mit1Δ(31-81)-13myc-KanMX6<br>ade6-216 ura4-D18 leu1-32 otr1R::ura4+ | 3C     | this study             |
| S.0IL  | h+ ade6M216 ura4-D18 mit1::mit1Δ(1-31)-13myc-KanMX6 otr1R::ura4+                                      | 3C     | this study             |
| S.0IN  | h+ ade6M210 ura4-DS/E mit1::mit1Δ(16-81)-13myc-KanMX6 otr1R::ura4+                                    | 3C     | this study             |
| S.0IQ  | h- ade6M210 ura4-D18 mit1::mit1I11R-13myc-KanMX6 otr1R::ura4+                                         | 3C     | this study             |
| S.0IU  | h- ade6M216 ura4-DS/E mit1::mit1Δ(9-13)-13myc-KanMX6 otr1R::ura4+                                     | 3C     | this study             |
| S.0IW  | h+ ade6M216 ura4-D18 leu1-32 mit1::mit1Δ(1-81)-13myc-KanMX6<br>otr1R::ura4+                           | 3C     | this study             |
| S.0GQ  | h- rpl42-P56Q (cyhR) ade6M210 ura4-D18 mit1::mit1LS                                                   | 3D     | this study             |
| S.0GT  | h- rpl42-P56Q (cyhR) ade6M210 ura4-D18 mit1::mit1Δ(31-81)                                             | 3D     | this study             |
| S.0GX  | h- rpl42-P56Q (cyhR) ade6M210 ura4-D18 mit1::mit1Δ(1-81)                                              | 3D     | this study             |

**Table S2. Oligonucleotides**

| Name  | Construct   | Sequence                    | Use             |
|-------|-------------|-----------------------------|-----------------|
| O.1I0 | tlh1_R      | CTCCTTGGAAGAATTGCAAGCCTC    | Fig. 1D, 3C     |
| O.1HZ | tlh1_F      | ATGGTCGTCGCTTCAGAAATTGC     | Fig. 1D, 3C     |
| O.1HY | cen-dg_R    | TGCTTCACGGTATTTTTTGAAATC    | Fig. 1D, 3C     |
| O.1HX | cen-dg_F    | AAGGAATGTGCCTCGTCAAATT      | Fig. 1D, 3C     |
| O.1HW | cen-dh_F    | GTATTTGGATTCCATCGGTACTATGG  | Fig. 1D, 3C, 3D |
| O.1HV | cen-dh_R    | ACTACATCGACACAGAAAAGAAAACAA | Fig. 1D, 3C, 3D |
| O.1K8 | ura4_RT-Rv1 | GAAGACATTTTCAGCCAAAAGCA     | Fig. 1C, 3B     |
| O.1K7 | ura4_RT-Fw1 | GGCCTCAAAGAAGTTGGTTTACC     | Fig. 1C, 3B     |
| O.10Z | act1_R      | TCTTTTCCATATCATCCCAGTTG     | Fig. 1F, 3D     |
| O.10Y | act1_F      | CTCAAAGCAAGCGTGGTATTT       | Fig. 1F, 3D     |
